# Supplementary material for: Machine learning identifies multi-parametric functional PET/MR imaging cluster to predict radiation resistance in preclinical head and neck cancer models
Source: Springer Nature journal article supplement (doi:10.1007/s00259-023-06254-9), 2023-05-06
Supplement: MOESM1 [file 25327310]

**Supplementary Table S1. Image registration parameters.** Settings used for rigid registration with the open-source toolkit *elastix*.

| <b>Item</b>                  | <b>Parameter</b>                     |
|------------------------------|--------------------------------------|
| Registration                 | Multi Resolution Registration        |
| Number of Resolutions        | 3                                    |
| Transform                    | Euler Transform                      |
| Metric                       | Advanced Mattes Mutual Information   |
| Number of Histogram Bins     | 64                                   |
| Optimizer                    | Adaptive Stochastic Gradient Descent |
| Number of Spatial Samples    | 5000                                 |
| Image Sampler                | Random                               |
| Maximum Number of Iterations | 4000                                 |
